# Supplementary material for: Plant habitat-conscious white light-emitting devices: Dy3+-emission considerably reduces involvement in photosynthesis
Source: Royal Society of Chemistry journal article supplement (doi:10.1039/c4tc02558j), 2015-01-01
Supplement: c4tc02558j1.pdf [file c4tc02558j1.pdf]

## Electronic Supplementary Information

# Plant habitat-conscious white light-emitting devices: Dy<sup>3+</sup>-emission considerably reduces involvement in photosynthesis

Tomohiko Nakajima,\* Harumi Hanawa and Tetsuo Tsuchiya

Advanced Manufacturing Research Institute, National Institute of Advanced Industrial Science and Technology, Tsukuba Central 5, 1-1-1 Higashi, Tsukuba, Ibaraki 305-8565, Japan.

As a comparison of emission intensity, we carried out measurements of luminance for the KYWP:Dy and the other reported Dy-phosphors (Fig. S1), Ca<sub>9</sub>La(PO<sub>4</sub>)<sub>3</sub>:Dy,<sup>1</sup> Ca<sub>9</sub>Y(PO<sub>4</sub>)<sub>3</sub>:Dy,<sup>2</sup> Ca<sub>3</sub>Si<sub>2</sub>O<sub>7</sub>:Dy,<sup>3</sup> LaAlGe<sub>2</sub>O<sub>7</sub>:Dy,<sup>4</sup> LiGdP<sub>4</sub>O<sub>12</sub>:Dy and LiYP<sub>4</sub>O<sub>12</sub>:Dy (LiGdP<sub>4</sub>O<sub>12</sub>:Dy and LiYP<sub>4</sub>O<sub>12</sub>:Dy were prepared as a related material with LiLaP<sub>4</sub>O<sub>12</sub>:Dy<sup>5</sup>, since we have not obtained sufficient quality product of this material.). All phosphors were prepared by a solid state reaction for this measurement.

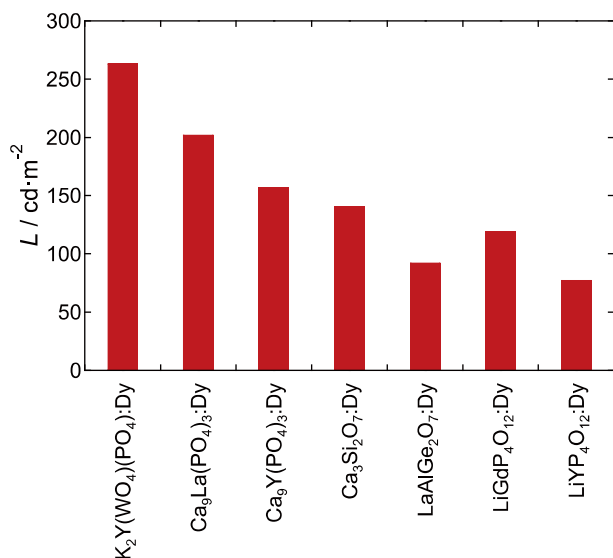

**Figure S1:** The luminance of Dy-phosphors observed under the UV excitation of 350 nm at 5 mW·cm<sup>-2</sup>.

We have checked the UV illumination effect to the *Chlorella* whether the near UV wavelength used in the Dy-WLED as the excitation at 385 nm damages the cells or not. Three different illumination conditions were

used: (1) WLED1 at 5k lm·m<sup>-2</sup>, (2) Dy-WLED at 5k lm·m<sup>-2</sup> and (3) UV-LED (365 nm) at 3 mW·cm<sup>-2</sup> in addition to the Dy-WLED at 5k lm·m<sup>-2</sup>. The excess UV light from the Dy-WLED was *ca.* 15 μW·cm<sup>-2</sup> in this measurement. The *Chlorella* dispersions were illuminated by these light sources for 165 hours. The optical microscope images are shown in Fig. S2. The *Chlorella* cells had green color derived from the chlorophylls, and the cell shape and color were not changed by the light sources during the illumination.

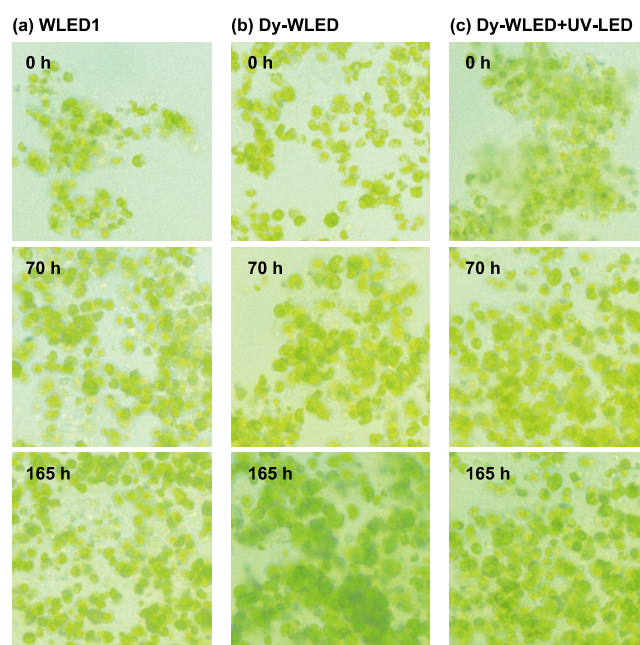

**Figure S2:** Optical microscope images for the *Chlorella* cultivated under three types of LEDs: (1) WLED1 at 5k lm·m<sup>-2</sup>, (2) Dy-WLED at 5k lm·m<sup>-2</sup> and (3) UV-LED (365 nm) at 3 mW·cm<sup>-2</sup> in addition to the Dy-WLED at 5k lm·m<sup>-2</sup>.

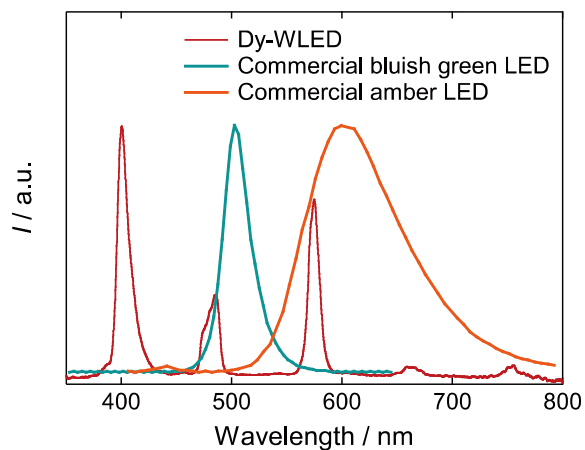

**Figure S3:** The emission spectra of LEDs.

Figure S3 shows the emission spectra of the Dy-WLED (this work) and commercial bluish green and amber LEDs (NCSE119AT<sup>6</sup> and NJSA172<sup>6</sup>, Nichia).

## References

- 1 Z-F. Hu, T. Meng, W. Zhang, Y-P. Cui, L. Luo and Y-H. Wang, *Acta Phys. Chim. Sin.*, 2013, **29**, 2271.
- 2 X. Wu, Y. Liang, R. Chen, M. Liu and Z. Cheng, *Mater. Chem. Phys.*, 2011, **129**, 1058.
- 3 X. Zhang, Z. Lu, F. Meng, L. Hu, X. Xu, J. Lin and C. Tang, *Mater Lett.*, 2012, **79**, 292.
- 4 Y-C. Li, Y-H. Chang, Y-F. Lin, Y-S. Chang and Y-J. Lin, *J. Alloys Compd.*, 2007, **439**, 367.
- 5 L. Marciniak, D. Hreniak and W. Strek, *J. Mater. Chem. C*, 2014, **2**, 5704.
- 6 Nichia corp.: <http://www.nichia.co.jp/en/product/led.html>
